# Supplementary material for: Plasmopara viticola effector PvRXLR131 suppresses plant immunity by targeting plant receptor‐like kinase inhibitor BKI1
Source: PubMed Central journal article supplement (PMC6637860; doi:10.1111/mpp.12790), 2019-04-04
Supplement: MPP-20-765-s001.pdf [file MPP-20-765-s001.pdf]

**FIGURE S1**

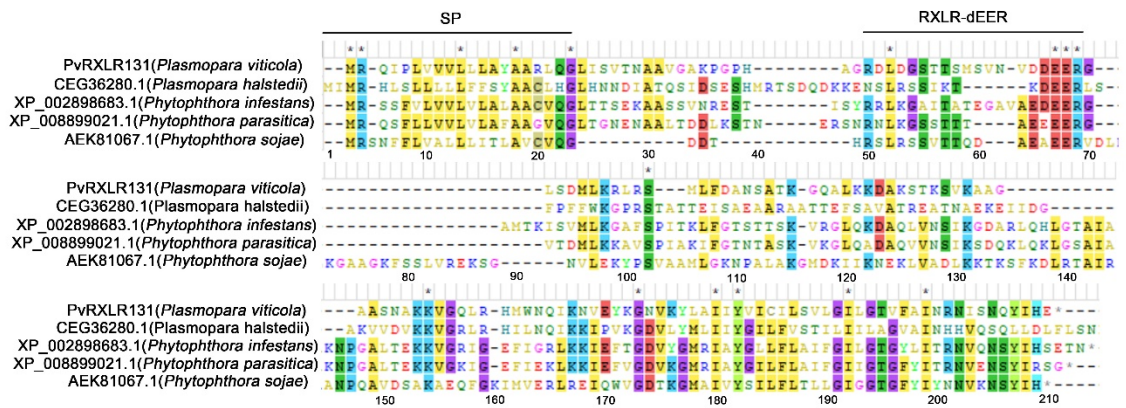

**S1 Fig.** Sequence alignment of PvRXLR131 and its homologs in oomycetes. The alignment was conducted by using ClustalW in MEGA7 software. Conserved sites at 60% level are shown in background color. The predicted signal peptide and RXLR-dEER motif are indicated. Species names are marked in the round brackets and the corresponding accession numbers are marked on the left.
