# Supplementary material for: Plasmopara viticola effector PvRXLR131 suppresses plant immunity by targeting plant receptor‐like kinase inhibitor BKI1
Source: PubMed Central journal article supplement (PMC6637860; doi:10.1111/mpp.12790), 2019-04-04
Supplement: MPP-20-765-s002.pdf [file MPP-20-765-s002.pdf]

FIGURE S2

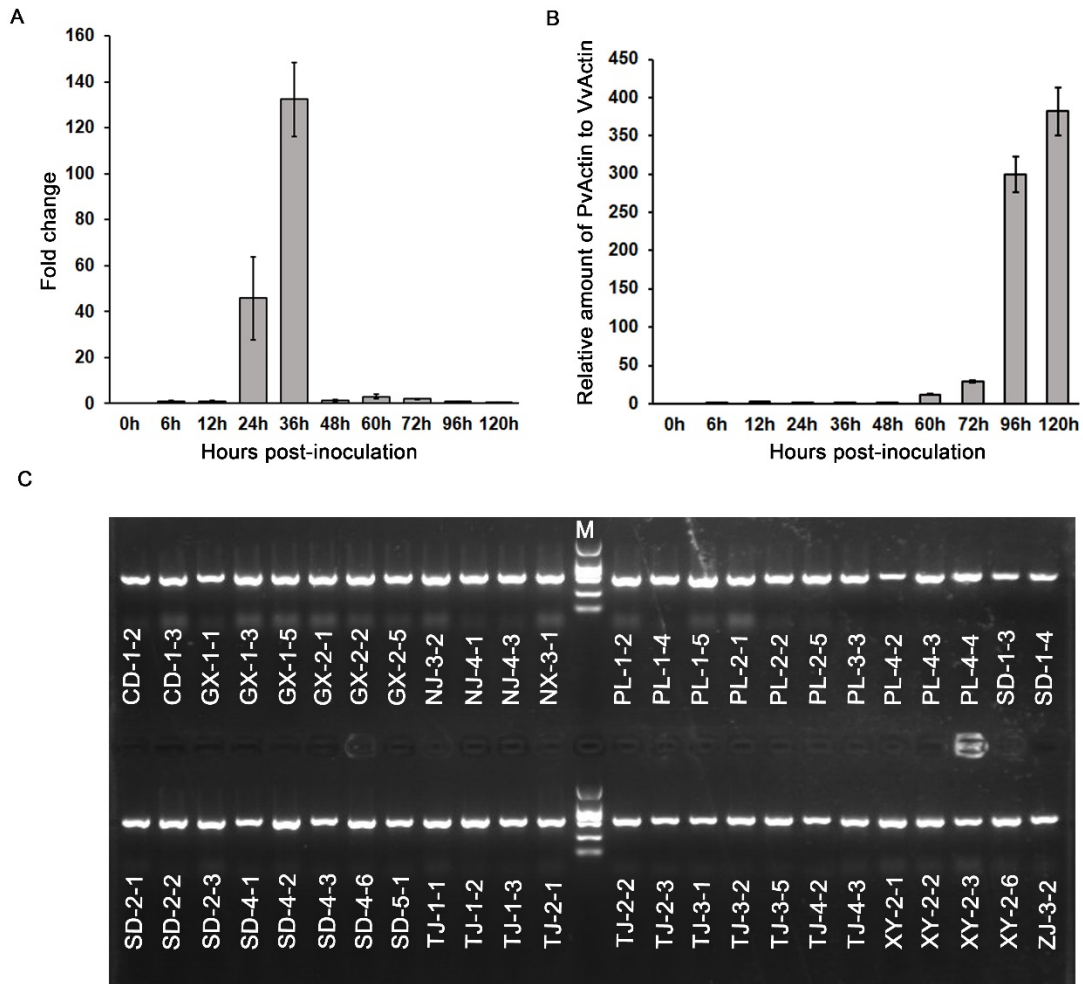

**S2 Fig.** Detection of the *PvRXLR131* gene. (A) *PvRXLR131* is expressed during infection. The leaf discs of the susceptible *Vitis vinifera* 'Thompson Seedless' were drop-inoculated with the spore suspension of *Plasmopara viticola* and harvested at indicated time-points post inoculation. The *PvRXLR131* transcript levels in the infected leaf discs were quantified by qPCR. The transcripts of *PvActin* (*P. viticola* actin) were used as the reference. The growth of *P. viticola* was monitored and plotted as the relative quantity of *PvActin* to *VvActin* (*V. vinifera* actin) (B). The error bars represent means  $\pm$  SD from three replicates. (C) *PvRXLR131* is detected in the gDNA samples from different *P. viticola* isolates. Each band (477 bp) indicates a PCR product from the corresponding *P. viticola* isolate gDNA. The PCR products were confirmed by sequencing. The primers of full-length effector genes were used. M, DNA marker.
