# Supplementary material for: Plasmopara viticola effector PvRXLR131 suppresses plant immunity by targeting plant receptor‐like kinase inhibitor BKI1
Source: PubMed Central journal article supplement (PMC6637860; doi:10.1111/mpp.12790), 2019-04-04
Supplement: MPP-20-765-s003.pdf [file MPP-20-765-s003.pdf]

FIGURE S3

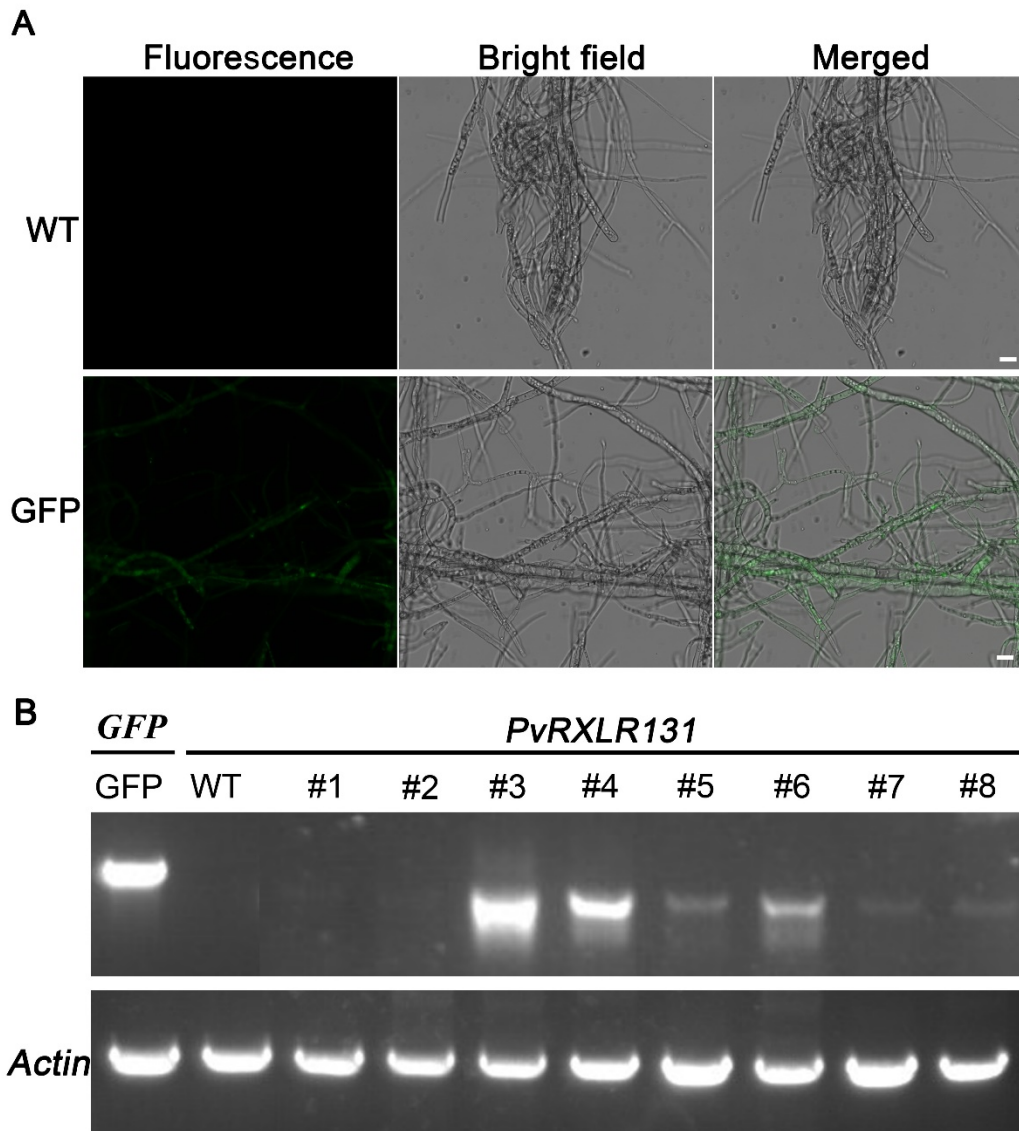

**S3 Fig.** Characterization of *Colletotrichum gloeosporioides* transformants by fluorescence microscopy and RT-PCR. (A) Green fluorescence is detected in *GFP*-transgenic *C. gloeosporioides*. Fungal hyphae were used for analysis. Bars=20µm. (B) RT-PCR expression analysis of *C. gloeosporioides* transformants. One line with high expression level of *GFP*, and two lines with high expression level of *PvRXLR131* (#3, #4) are shown. *Actin* was used as an endogenous reference gene.
