# Supplementary material for: Plasmopara viticola effector PvRXLR131 suppresses plant immunity by targeting plant receptor‐like kinase inhibitor BKI1
Source: PubMed Central journal article supplement (PMC6637860; doi:10.1111/mpp.12790), 2019-04-04
Supplement: MPP-20-765-s004.pdf [file MPP-20-765-s004.pdf]

**FIGURE S4**

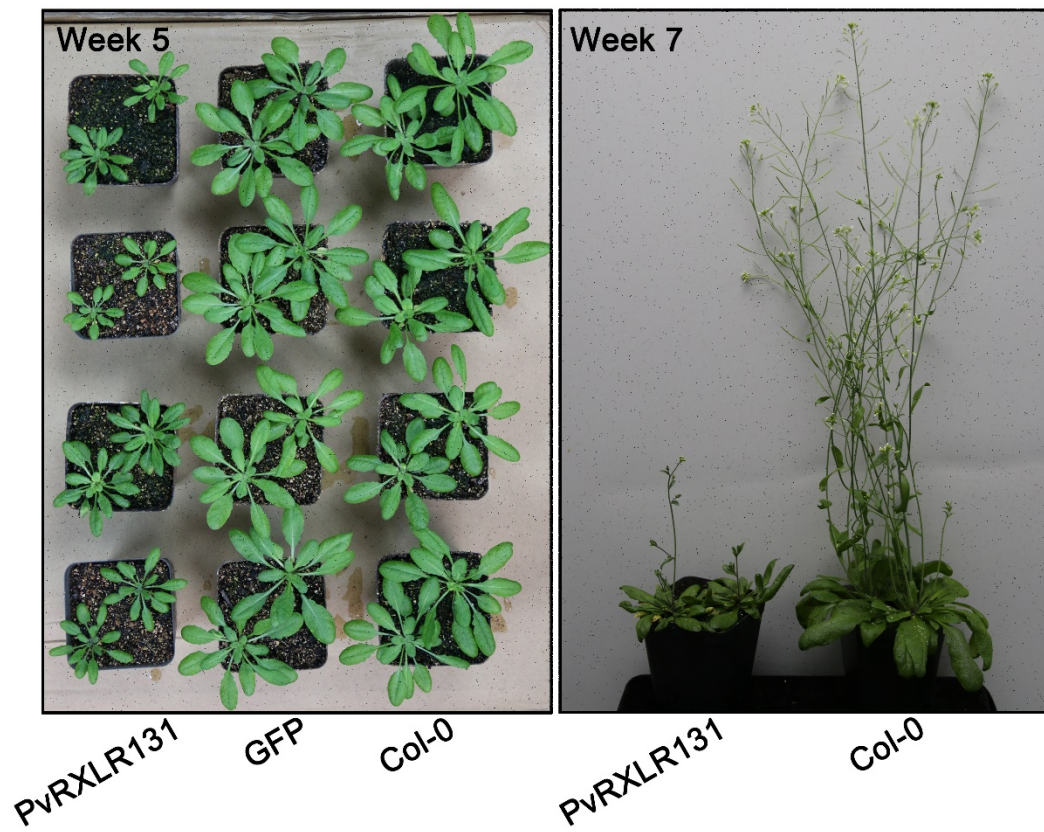

**S4 Fig.** *PvRXLR131*-transgenic *Arabidopsis* display dwarf phenotype. Five-week-old and Seven-week-old *Arabidopsis* (*PvRXLR131*-transgenic, *GFP*-transgenic and Col-0) were photographed.
