# Supplementary material for: Plasmopara viticola effector PvRXLR131 suppresses plant immunity by targeting plant receptor‐like kinase inhibitor BKI1
Source: PubMed Central journal article supplement (PMC6637860; doi:10.1111/mpp.12790), 2019-04-04
Supplement: MPP-20-765-s005.pdf [file MPP-20-765-s005.pdf]

**FIGURE S5**

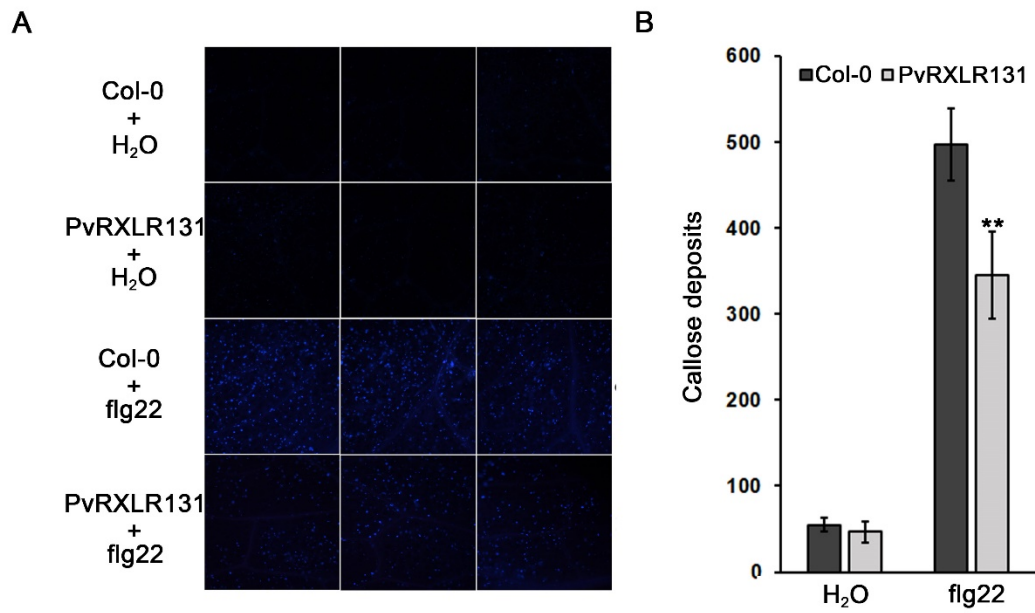

**S5 Fig.** PvRXLR131 affects callose deposition in *Arabidopsis*. *PvRXLR131*-transgenic *Arabidopsis* and Col-0 were treated with flg22. *PvRXLR131*-transgenic *Arabidopsis* show reduced callose deposition compared with Col-0 after flg22 treatment (A, B). Each data represents means  $\pm$  SD from three replicates; asterisks indicate significant differences from Col-0 (\*\* $P < 0.01$ , Student's t test).
