# Supplementary material for: Plasmopara viticola effector PvRXLR131 suppresses plant immunity by targeting plant receptor‐like kinase inhibitor BKI1
Source: PubMed Central journal article supplement (PMC6637860; doi:10.1111/mpp.12790), 2019-04-04
Supplement: MPP-20-765-s006.pdf [file MPP-20-765-s006.pdf]

**FIGURE S6**

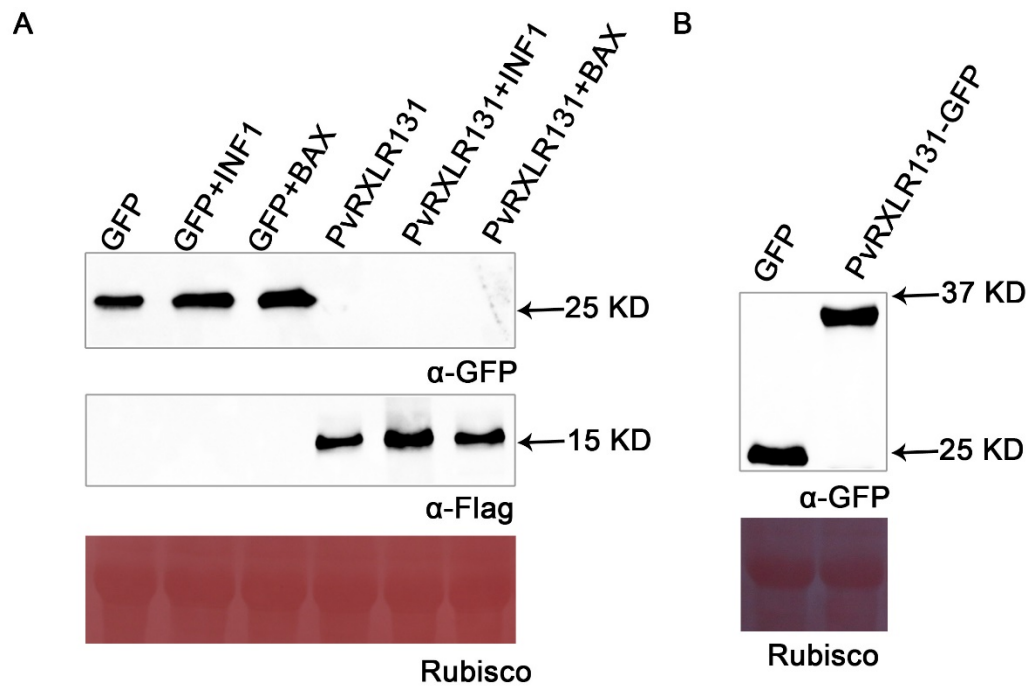

**S6 Fig.** Detection of protein expression. (A) Immunoblot analysis of proteins from *Nicotiana benthamiana* leaves transiently expressing GFP and PvrXLR131-Flag from the pGR106 vector. (B) Immunoblot analysis of proteins from *N. benthamiana* leaves transiently expressing GFP and PvrXLR131-GFP from the pBI121 vector. Ponceau-S (PS) stained rubisco large subunit serves as a loading control.
