# Supplementary material for: Plasmopara viticola effector PvRXLR131 suppresses plant immunity by targeting plant receptor‐like kinase inhibitor BKI1
Source: PubMed Central journal article supplement (PMC6637860; doi:10.1111/mpp.12790), 2019-04-04
Supplement: MPP-20-765-s008.pdf [file MPP-20-765-s008.pdf]

**FIGURE S8**

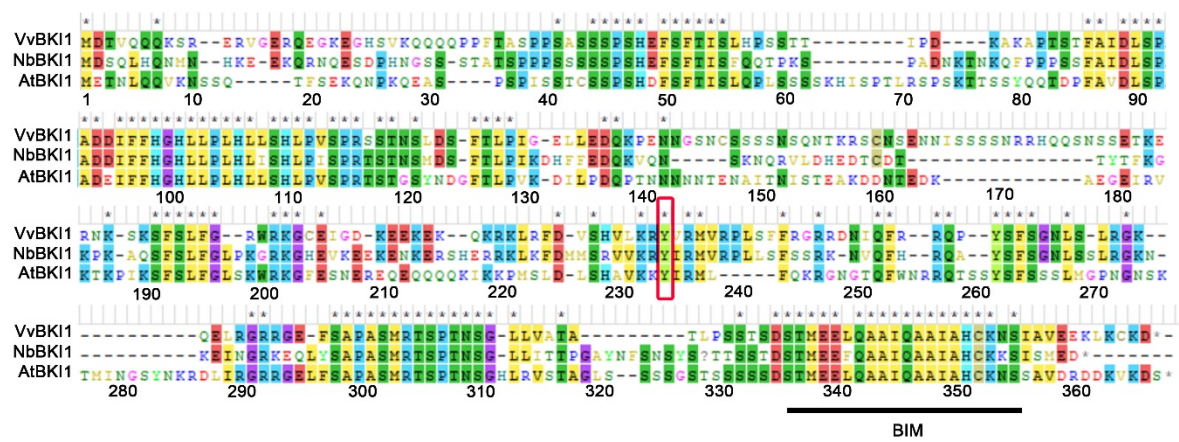

**S8 Fig.** Alignment of amino acid sequences of VvBK11, NbBK11, and AtBK11. The alignment was conducted by using ClustalW in MEGA7 software. The conserved sites at 60% level are showed in background color. Conserved tyrosine site is labeled in red box.
