# Supplementary material for: Plasmopara viticola effector PvRXLR131 suppresses plant immunity by targeting plant receptor‐like kinase inhibitor BKI1
Source: PubMed Central journal article supplement (PMC6637860; doi:10.1111/mpp.12790), 2019-04-04
Supplement: MPP-20-765-s009.pdf [file MPP-20-765-s009.pdf]

**FIGURE S9**

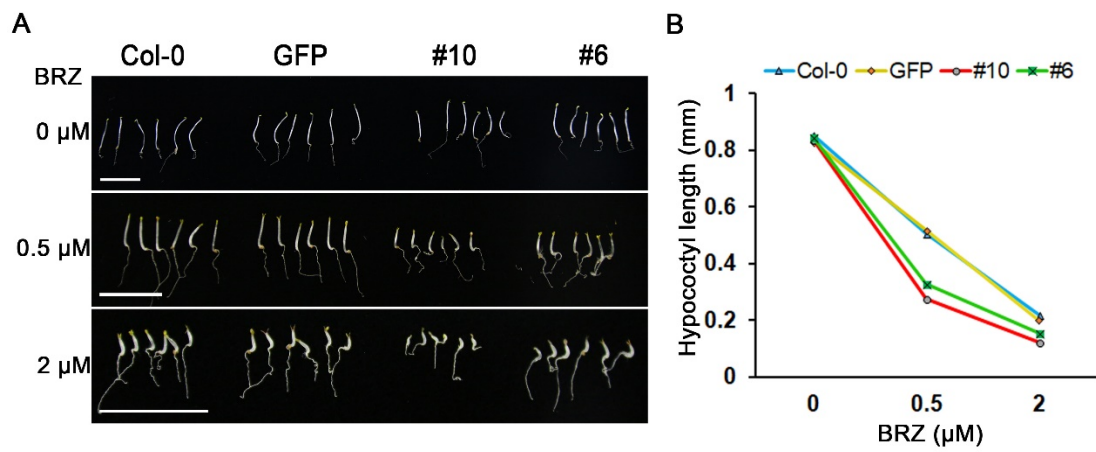

**S9 Fig.** Overexpression of PvRXLR131-GFP leads to an enhanced response to BRZ. Hypocotyl length of at least 40 seedlings were measured. Scale bar = 10 mm.
