# Supplementary material for: Plasmopara viticola effector PvRXLR131 suppresses plant immunity by targeting plant receptor‐like kinase inhibitor BKI1
Source: PubMed Central journal article supplement (PMC6637860; doi:10.1111/mpp.12790), 2019-04-04
Supplement: MPP-20-765-s010.pdf [file MPP-20-765-s010.pdf]

FIGURE S10

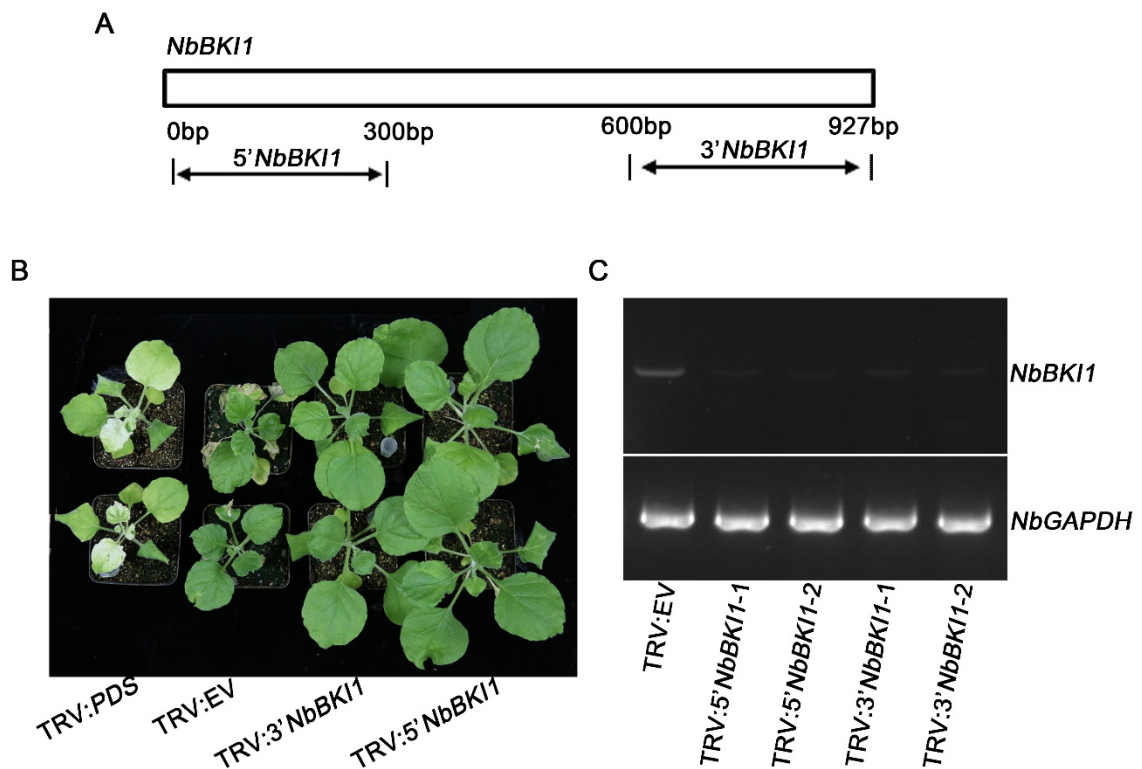

**S10 Fig.** Silencing of *NbBKII* in *Nicotiana benthamiana*. (A) VIGS constructs of *NbBKII*. ~300bp fragment of 5'- and 3'- *NbBKII* were introduced into pTRV2 vector and used for *NbBKII* silencing. (B) *NbBKII*-silenced plants showed significantly larger size compared with TRV:EV and TRV:*PDS* controls. (C) *NbBKII* silencing was detected by semi-quantitative RT-PCR. Both of the 5'- and 3'-*NbBKII* silencing constructs resulted in reduction of expression level of *NbBKII* gene. *GAPDH* gene was used as an endogenous reference gene.
