# Supplementary material for: Plasmopara viticola effector PvRXLR131 suppresses plant immunity by targeting plant receptor‐like kinase inhibitor BKI1
Source: PubMed Central journal article supplement (PMC6637860; doi:10.1111/mpp.12790), 2019-04-04
Supplement: MPP-20-765-s011.pdf [file MPP-20-765-s011.pdf]

**FIGURE S11**

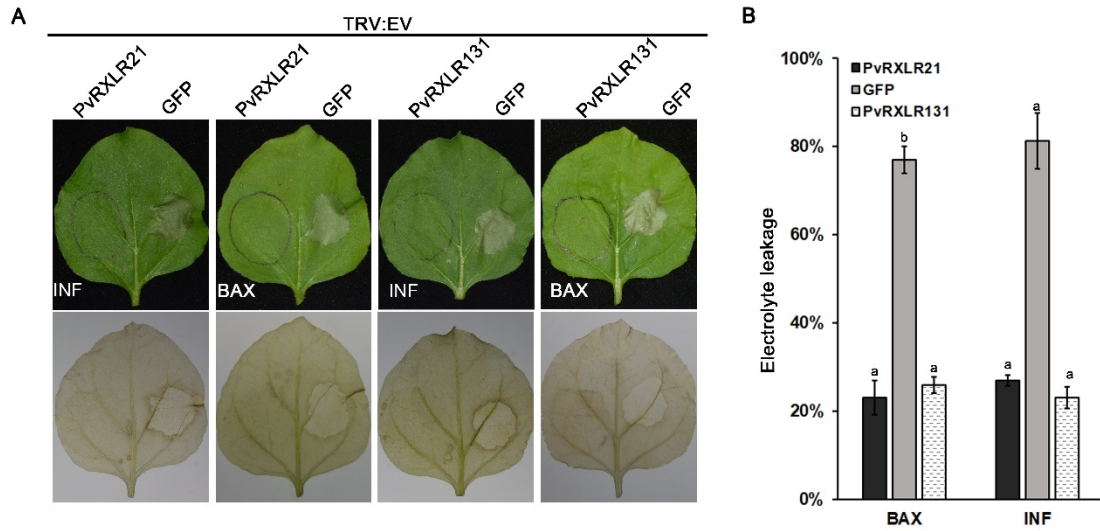

**S11 Fig.** PvRXLR131 suppresses elicitor-triggered cell death in TRV:EV leaves. (A) *Agrobacterium* GV3101 carrying pGR106-PvRXLR131, pGR106-GFP, and pGR106-PvRXLR21 (positive control) constructs were infiltrated into TRV:EV *Nicotiana benthamiana* leaves; GV3101 containing pGR106-INF/BAX was infiltrated at the first infiltration region after 24 h. Cell death was scored 5 days after the second infiltration. The lower line indicates corresponding decolorized *N. benthamiana* leaves. Quantification of cell death by electrolyte leakage are shown (B). Each data point represents means  $\pm$  SD from three biological replicates; values with different letters show significant differences between mean values at  $p = 0.01$  (LSD).
