# Supplementary material for: Plasmopara viticola effector PvRXLR131 suppresses plant immunity by targeting plant receptor‐like kinase inhibitor BKI1
Source: PubMed Central journal article supplement (PMC6637860; doi:10.1111/mpp.12790), 2019-04-04
Supplement: MPP-20-765-s012.pdf [file MPP-20-765-s012.pdf]

FIGURE S12

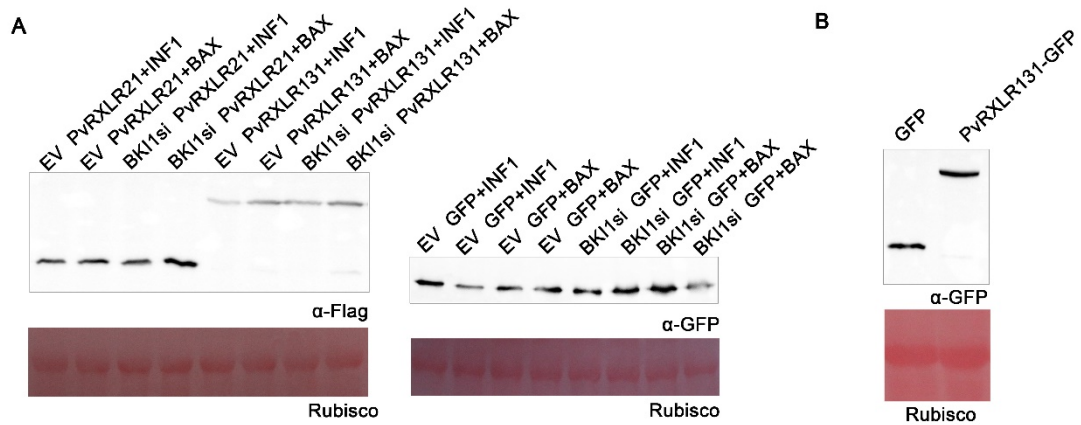

**S12 Fig.** Detection of protein expression. (A) Immunoblot analysis of proteins from TRV:EV (EV) and *NbBK11*-silenced (BK11si) *Nicotiana benthamiana* transiently expressing PvRXLR131-Flag, PvRXLR21-Flag, and GFP from the pGR106 vector. (B) Immunoblot analysis of proteins from *N. benthamiana* leaves transiently expressing GFP and PvRXLR131-GFP from the pB1121 vector. Ponceau-S (PS) stained rubisco large subunit serves as a loading control.
