# Supplementary material for: Plasmopara viticola effector PvRXLR131 suppresses plant immunity by targeting plant receptor‐like kinase inhibitor BKI1
Source: PubMed Central journal article supplement (PMC6637860; doi:10.1111/mpp.12790), 2019-04-04
Supplement: MPP-20-765-s013.pdf [file MPP-20-765-s013.pdf]

**Table S1: Primers for PvRXLR131 plasmid construction**

| Plasmid      | Primer                                | sequence                                                  |
|--------------|---------------------------------------|-----------------------------------------------------------|
| pLB          | PvRXLR131Full-length-F                | ATGCGTCAAATTCCTCTTGTCG                                    |
|              | PvRXLR131Full-length-R                | CTACTCGTGAATATACTGATTCGAG                                 |
| pSUC2        | PvRXLR131SP EcoRI-F                   | CCG <b>GAATTC</b> ATGCGTCAAATTCCTCTTGTCG                  |
|              | PvRXLR131SP XhoI-R                    | CCG <b>CTCGAG</b> GCCTTGAAGACGTGCTGC                      |
| pGR106       | PvRXLR131 ClaI-F                      | CC <b>ATCGAT</b> ATGCTAATAAGCGTGACCAACGC                  |
|              | PvRXLR131 Sall-R                      | ACGC <b>GTCGAC</b> CTACTCGTGAATATACTGATTCG                |
| pCB1532      | PvRXLR131 XhoI-F                      | CCG <b>CTCGAG</b> ATGCGTCAAATTCCTCTTGTCG                  |
|              | PvRXLR131 Bgl II-R                    | GA <b>AGATCT</b> CTCGTGAATATACTGATTCGAG                   |
| pBI121       | PvRXLR131 XbaI-F                      | GCT <b>TCTAGA</b> ATGCTAATAAGCGTGACCAACGC                 |
|              | PvRXLR131 KpnI-R                      | GG <b>GGTACCC</b> CTCGTGAATATACTGATTCG                    |
| pCAMBIA1300  | PvRXLR131 XbaI-F                      | GCT <b>TCTAGA</b> ATGCTAATAAGCGTGACCAACGC                 |
|              | PvRXLR131 BstBI-R                     | GG <b>TTCGAA</b> CTCGTGAATATACTGATTCG                     |
| pXY106(nYFP) | PvRXLR131 BamHI-F                     | CG <b>GGATCC</b> ATGCTAATAAGCGTGACCAACGC                  |
|              | PvRXLR131 Sall-R                      | ACGC <b>GTCGAC</b> CTACTCGTGAATATACTGATTCG                |
| pColdIII     | PvRXLR131 BamHI-F                     | CG <b>GGATCC</b> ATGCTAATAAGCGTGACCAACGC                  |
|              | PvRXLR131 Sall-R                      | ACGC <b>GTCGAC</b> CTACTCGTGAATATACTGATTCG                |
| pGBKT7       | PvRXLR131 SfiI-F                      | TC <b>GGCC</b> ATTAC <b>GGCC</b> ATGCTAATAAGCGTGACCAACGC  |
|              | PvRXLR131 SfiI-R                      | AG <b>GGCC</b> GAGGC <b>GGCC</b> CTACTCGTGAATATACTGATTCG  |
|              | PvRXLR131 <sup>aa21-119</sup> SfiI-F  | TC <b>GGCC</b> ATTAC <b>GGCC</b> ATGCTAATAAGCGTGACCAACGC  |
|              | PvRXLR131 <sup>aa21-119</sup> SfiI-R  | AG <b>GGCC</b> ATTAC <b>GGCC</b> CTAGTACTCAACATTTTTGATCTG |
|              | PvRXLR131 <sup>aa58-158</sup> SfiI-F  | TC <b>GGCC</b> ATTAC <b>GGCC</b> ATGGGGCTTTCAGATATGC      |
|              | PvRXLR131 <sup>aa58-158</sup> SfiI-R  | AG <b>GGCC</b> ATTAC <b>GGCC</b> CTACTCGTGAATATACTGATTCG  |
|              | PvRXLR131 <sup>aa120-158</sup> SfiI-F | TC <b>GGCC</b> ATTAC <b>GGCC</b> ATGAAAGGCAATGTCAAG       |
|              | PvRXLR131 <sup>aa120-158</sup> SfiI-R | AG <b>GGCC</b> ATTAC <b>GGCC</b> CTACTCGTGAATATACTGATTCG  |

Red font indicates corresponding restriction enzyme recognition sites in the primer name. F: forward primer, R: reverse primer.
