# Supplementary material for: Plasmopara viticola effector PvRXLR131 suppresses plant immunity by targeting plant receptor‐like kinase inhibitor BKI1
Source: PubMed Central journal article supplement (PMC6637860; doi:10.1111/mpp.12790), 2019-04-04
Supplement: MPP-20-765-s014.pdf [file MPP-20-765-s014.pdf]

**Table S2: Primers for BKI1 plasmid construction**

| Plasmid      | Primer                     | sequence                                      |                                               |
|--------------|----------------------------|-----------------------------------------------|-----------------------------------------------|
| pLB          | VvBKI1-F                   | ATGGATACCGTACAGCAGCAGAAG                      |                                               |
|              | VvBKI1-R                   | CTAGTCTTTGCATTTGAGTTTCTC                      |                                               |
|              | VvBKI1 <sup>Y211D</sup> -F | AGCCATGTACTGAAGAGGGACGTGAGAATGGTTCGACCC       |                                               |
|              | VvBKI1 <sup>Y211D</sup> -R | GGGTCGAACCATTCTCACGTCCCTCTTCAGTACATGGCT       |                                               |
|              | VvBKI1 <sup>Y211F</sup> -F | AGCCATGTACTGAAGAGGTTCTGTGAGAATGGTTCGACCC      |                                               |
|              | VvBKI1 <sup>Y211F</sup> -R | GGGTCGAACCATTCTCACGAACCTCTTCAGTACATGGCT       |                                               |
|              | AtBKI1-F                   | ATGGAAACTAATCTACAACAGGT                       |                                               |
|              | AtBKI1-R                   | TCAAGAATCCTTAACCTTATCATCA                     |                                               |
|              | AtBKI1 <sup>Y211D</sup> -F | GTCACGCCGTCAAGAAGGACATAAGGATGTTGTTTCAG        |                                               |
|              | AtBKI1 <sup>Y211D</sup> -R | CTGAAACAACATCCTTATGTCCTTCTTGACGGCGTGAC        |                                               |
|              | AtBKI1 <sup>Y211F</sup> -F | GTCACGCCGTCAAGAAGTTCATAAGGATGTTGTTTCAG        |                                               |
|              | AtBKI1 <sup>Y211F</sup> -R | CTGAAACAACATCCTTATGAACCTTCTTGACGGCGTGAC       |                                               |
|              | NbBKI1-F                   | ATGGACAGCCAATTACACCAAAAC                      |                                               |
|              | NbBKI1-R                   | TTAGTCTTCCATTGAAATAGATTTTC                    |                                               |
|              | NbBKI1 <sup>Y199D</sup> -F | GAGTCGAGTTGTGAAGAGGGACATAAGAATGGTTAGACC       |                                               |
|              | NbBKI1 <sup>Y199D</sup> -R | GGTCTAACCATTCTTATGTCCTCTTCACAACCTCGACTC       |                                               |
|              | NbBKI1 <sup>Y199F</sup> -F | GAGTCGAGTTGTGAAGAGGTTATAAGAATGGTTAGACC        |                                               |
|              | NbBKI1 <sup>Y199F</sup> -R | GGTCTAACCATTCTTATGAACCTCTTCACAACCTCGACTC      |                                               |
|              | pGADT7                     | VvBKI1 XmaI-F                                 | TCCC <b>CCCGGG</b> G ATGGATACCGTACAGCAGCAGAAG |
|              |                            | VvBKI1 ClaI-R                                 | <b>CCATCGAT</b> CTAGTCTTTGCATTTGAGTTTCTC      |
| AtBKI1-F     |                            | TCCC <b>CCCGGG</b> G ATGGAAACTAATCTACAACAGGT  |                                               |
| AtBKI1-R     |                            | <b>CCATCGAT</b> TCAAGAATCCTTAACCTTATCATCA     |                                               |
| NbBKI1-F     |                            | TCCC <b>CCCGGG</b> G ATGGACAGCCAATTACACCAAAAC |                                               |
| NbBKI1-R     |                            | <b>CCATCGAT</b> TTAGTCTTCCATTGAAATAGATTTTC    |                                               |
| pBI121       | VvBKI1 XbaI-F              | <b>GC</b> TCTAGA ATGGATACCGTACAGCAGCAGAAG     |                                               |
|              | VvBKI1 KpnI-R              | <b>GGGGTACCC</b> GTCTTTGCATTTGAGTTTCTC        |                                               |
| pET3α        | VvBKI1 BamHI-F             | <b>CGGGATCC</b> ATGGATACCGTACAGCAGCAGAAG      |                                               |
|              | VvBKI1 XhoI-R              | <b>CCGCTCGAG</b> GTCTTTGCATTTGAGTTTCTC        |                                               |
| pXY104(cYFP) | VvBKI1 BamHI-F             | <b>CGGGATCC</b> ATGGATACCGTACAGCAGCAG         |                                               |
|              | VvBKI1 Sall-R              | ACGC <b>GTCGAC</b> GTCTTTGCATTTGAGTTTCTC      |                                               |
| pTRV1        | 5'NbBKI1 VIGS-F            | TCCC <b>CCCGGG</b> G ATGGACAGCCAATTCACCAA     |                                               |
|              | 5'NbBKI1 VIGS-R            | <b>CGGGGTACC</b> AGGAAGATGGGAAATAAGGTG        |                                               |
|              | 3'NbBKI1 VIGS-F            | TCCC <b>CCCGGG</b> G AGAATGGTTAGACCTCTTTTA    |                                               |
|              | 3'NbBKI1 VIGS-R            | <b>CGGGGTACC</b> TTAGTCTTCCATTGAAATAGAT       |                                               |

Red font indicates corresponding restriction enzyme recognition sites in the primer name. F: forward primer, R: reverse primer.
