# Supplementary material for: Plasmopara viticola effector PvRXLR131 suppresses plant immunity by targeting plant receptor‐like kinase inhibitor BKI1
Source: PubMed Central journal article supplement (PMC6637860; doi:10.1111/mpp.12790), 2019-04-04
Supplement: MPP-20-765-s015.pdf [file MPP-20-765-s015.pdf]

**Table S3: Primers for quantitative PCR**

| <b>Gene</b>      | <b>primer</b> | <b>sequence</b>          |
|------------------|---------------|--------------------------|
| <i>CPD</i>       | AtCPD-F       | TTACCGCAAAGCCATCCAA      |
|                  | AtCPD-R       | TCATCACCACCACCGTCAAC     |
| <i>DWF4</i>      | AtDWF4-F      | GTTGGCCATTTCTTGGTAAA     |
|                  | AtDWF4-R      | TGGCGGTGTACGGTTTAAGAT    |
| <i>Saur-AC1</i>  | AtSaur-AC1-F  | TTGGGTGCTAAGCAAATTATTCG  |
|                  | AtSaur-AC1-R  | TCTCCTACATAGACCGCCATGA   |
| <i>U-box</i>     | AtU-box-F     | TGCGCTGCCAGATAATACACTATT |
|                  | AtU-box-R     | TGCTGCCCAACATCAGGTT      |
| <i>PvRXLR131</i> | PvRXLR131-F   | GGCGTTGAAAAAGGACGC       |
|                  | PvRXLR131-R   | TCCAAGTACACTTAGGATAC     |
| <i>VvActin</i>   | VvActin-F     | AGACAGGATGAGCAAGGAAATC   |
|                  | VvActin-R     | GCCTCCAATCCATACGCTATAC   |
| <i>PvActin</i>   | PvActin-F     | CGATCTCGTATCTGAATA       |
|                  | PvActin-R     | CTACATCATCTCATCCAT       |

F: forward primer, R: reverse primer.
