# Supplementary material for: Plasmopara viticola effector PvRXLR131 suppresses plant immunity by targeting plant receptor‐like kinase inhibitor BKI1
Source: PubMed Central journal article supplement (PMC6637860; doi:10.1111/mpp.12790), 2019-04-04
Supplement: MPP-20-765-s016.pdf [file MPP-20-765-s016.pdf]

**Table S4: Other primers used**

| <b>Gene</b>     | <b>primer</b>    | <b>sequence</b>                     |
|-----------------|------------------|-------------------------------------|
| <i>PvRXLR90</i> | PvRXLR90 BamHI-F | CGGGATCC ATGACGGAAGTTCAAGGTACACCAGG |
|                 | PvRXLR90 Sall-R  | ACGCGTCGAC TCAAAGTCGACGACGACGG      |
| <i>VvBAK1</i>   | VvBAK1 BamHI-F   | CGGGATCC ATGGAGGCAATCTTTCTCTGC      |
|                 | VvBAK1 Sall-R    | ACGCGTCGAC TCTGGGACCGGACAATTCTTC    |
| <i>GAPDH</i>    | NbGAPDH-F        | ATGGCATCTGACAAGAAGATCAAG            |
|                 | NbGAPDH -R       | TTAAGCAACAGAAGCCATATGGCAG           |
| <i>Actin</i>    | CgActin-F        | GGTGCTGCTTTCTGGCAAATCTATCT          |
|                 | CgActin-R        | TGAACTCCATCTCGTCCATACCCTC           |

F: forward primer, R: reverse primer.
